# Supplementary material for: Distinct Gut Microbiota in Patients with Asymptomatic Hyperuricemia: A Potential Protector against Gout Development
Source: PubMed Central journal article supplement — Yonsei Med J. 2022 Feb 17;63(3):241–51. doi: 10.3349/ymj.2022.63.3.241 (PMC8860935; doi:10.3349/ymj.2022.63.3.241), 2022-02-17
Supplement: ymj-63-241-s001.pdf [file ymj-63-241-s001.pdf]

**Supplementary Table 1.** List of Primers and Polymerase Chain Reaction Conditions Used in This Study

| Target                              | Direction | Primer sequence            | Amplicon size | Annealing temp. | Reference  |
|-------------------------------------|-----------|----------------------------|---------------|-----------------|------------|
| <i>Uncultured bacterium</i>         | forward   | CTTATGAATAAGGACCGGCTAATT   | 215           | 58 celcius      | This study |
|                                     | reverse   | CTAAGCATTTCACCGCTACAC      |               |                 |            |
| <i>Prevotella</i>                   | forward   | CAACGGTGAAACTCAAAGGAATT    | 198           | 58 celcius      | This study |
|                                     | reverse   | CACTTAAGCCGACACCTCAC       |               |                 |            |
| <i>Bacteroides</i>                  | forward   | CAACGGTGAAACTCAAAGGAATT    | 202           | 58 celcius      | This study |
|                                     | reverse   | GTTATGGCACTTAAGCCGACA      |               |                 |            |
| <i>Lachnospiraceae bacterium</i>    | forward   | CTACACTAGGAATTCGCTTG       | 217           | 58 celcius      | This study |
|                                     | reverse   | GAAGAAAATGACGGTACCTGAC     |               |                 |            |
| <i>Uncultured bacterium</i>         | forward   | GTATCGAACAGGATTGGATACC     | 207           | 58 celcius      | This study |
|                                     | reverse   | GTAAGGTTCCCTCGCGTATCAT     |               |                 |            |
| <i>Uncultured bacterium</i>         | forward   | GAGGCAGCAGTGGGGAATAT       | 196           | 58 celcius      | This study |
|                                     | reverse   | AGTAAATCCGGACAACGCTTG      |               |                 |            |
| <i>Uncultured bacterium</i>         | forward   | GTCCACGCAGTAAACGATGAA      | 206           | 58 celcius      | This study |
|                                     | reverse   | TGATTGCGCCGACGTTTGAG       |               |                 |            |
| <i>Dialister</i>                    | forward   | GATTAGATACCCTGGTAGTCCA     | 225           | 58 celcius      | This study |
|                                     | reverse   | GAATGGCGATCAATGTCAAGAC     |               |                 |            |
| <i>Agathobacter</i>                 | forward   | GAGACTGCCAGGGATAACCT       | 199           | 58 celcius      | This study |
|                                     | reverse   | GATTACTAGCGATTCCAGCTTC     |               |                 |            |
| <i>Ruminococcus</i>                 | forward   | CTTGAGTGAAGTAGAGGTAGG      | 174           | 58 celcius      | This study |
|                                     | reverse   | AATCATCGTTTACAGCGTGGAC     |               |                 |            |
| <i>Clostridiales_uc_F</i>           | forward   | GATTAGATACCCTGGTAGTCC      | 199           | 58 celcius      | This study |
|                                     | reverse   | GTAAGGTTCTTCGCGTTGCTT      |               |                 |            |
| <i>Uncultured bacterium</i>         | forward   | GAAGGTTCTTCGCGTTGCTT       | 199           | 58 celcius      | This study |
|                                     | reverse   | GTATTTCATCGTTTACGGCGTG     |               |                 |            |
| <i>Uncultured bacterium</i>         | forward   | AACGATGGATACTAGGTGTGG      | 202           | 58 celcius      | This study |
|                                     | reverse   | TCTAGACCGGTCAATCGGGAT      |               |                 |            |
| <i>Clostridium</i>                  | forward   | GGCTTACTGGACAGTAACTGA      | 195           | 58 celcius      | This study |
|                                     | reverse   | CCCCTCAATTCCTTTGAGTTTC     |               |                 |            |
| <i>Veillonellaceae</i>              | forward   | GGATGACGTCAAGTCATCATG      | 199           | 58 celcius      | This study |
|                                     | reverse   | GGAACGTATTACCCGAGTAT       |               |                 |            |
| <i>Uncultured bacterium</i>         | forward   | GGCAGCAGTGGGGAATATTG       | 214           | 58 celcius      | This study |
|                                     | reverse   | CCTACACACCCTTTACACCC       |               |                 |            |
| <i>Uncultured bacterium</i>         | forward   | CCTACCAAGTCGACGATCAG       | 204           | 58 celcius      | This study |
|                                     | reverse   | CCAGGTACCGTCACTTCCTT       |               |                 |            |
| <i>Uncultured bacterium</i>         | forward   | GGAGTACGTTTCGCAAGAATGAA    | 211           | 58 celcius      | This study |
|                                     | reverse   | GGACTTAACCCAACATCTCAC      |               |                 |            |
| <i>Butyricimonas virosa</i>         | forward   | ACTGGATCTTGGCGATACACT      | 199           | 58 celcius      | This study |
|                                     | reverse   | GAAGAAGCGTTTCCACCTCAT      |               |                 |            |
| <i>Christensenella</i>              | forward   | AACTGAGACACGGTCCAGAC       | 198           | 58 celcius      | This study |
|                                     | reverse   | TACGTATTACCGCGGTGCT        |               |                 |            |
| <i>Leuconostocaceae</i>             | forward   | AGACTGCCGGTGACAACC         | 198           | 58 celcius      | This study |
|                                     | reverse   | GATTACTAGCGATTCCGACTTC     |               |                 |            |
| <i>Uncultured bacterium</i>         | forward   | GTGGGGAATATTGCACAATTGG     | 198           | 58 celcius      | This study |
|                                     | reverse   | CTCCCTTACACCCAGTAATC       |               |                 |            |
| <i>Uncultured bacterium</i>         | forward   | CAAACGCAGTAAGTATCCACC      | 202           | 58 celcius      | This study |
|                                     | reverse   | GACAACCATGCACCACCTGT       |               |                 |            |
| <i>Uncultured bacterium</i>         | forward   | CAACGCAATAAGTAGTCCACCT     | 199           | 58 celcius      | This study |
|                                     | reverse   | CAACCATGCACCACCTGTCT       |               |                 |            |
| <i>Lactobacillus casei</i>          | forward   | GTGAAGAAGGCTTTCGGGTC       | 210           | 58 celcius      | This study |
|                                     | reverse   | CCGAGGGCTTTCACATCAGA       |               |                 |            |
| <i>Mitsuokella jalaludinii</i>      | forward   | TTCTTGAGTGCAGGAGAGGAAA     | 195           | 58 celcius      | This study |
|                                     | reverse   | GATACCTCCTACACCTAGCATT     |               |                 |            |
| <i>Lachnospiraceae bacterium</i>    | forward   | GGCAGCAGTGGGGAATTTG        | 197           | 58 celcius      | This study |
|                                     | reverse   | ACACCCAGTAAATCCGGATAAC     |               |                 |            |
| <i>Paraburkholderia kururiensis</i> | forward   | GTCTGTGAGATGTTGGGTTAAGT    | 222           | 58 celcius      | This study |
|                                     | reverse   | ACTACGATCGGTTTTCTGGGAT     |               |                 |            |
| <i>Uncultured bacterium</i>         | forward   | GTAAGGCTCTATCAGCAGGGAA     | 201           | 58 celcius      | This study |
|                                     | reverse   | TAGCTGCACAGTTTCAAAGCA      |               |                 |            |
| <i>Uncultured bacterium</i>         | forward   | CTTAGATATCACGAAGAACCCC     | 192           | 58 celcius      | This study |
|                                     | reverse   | GTAAGGCTCTATCAGCAGGGAA     |               |                 |            |
| <i>Actinomyces</i>                  | forward   | TTGTGAACCTTTCGCCAGT        | 196           | 58 celcius      | This study |
|                                     | reverse   | CCAGTTAAGCCAGAGGATTTT      |               |                 |            |
| <i>Anaerofustis</i>                 | forward   | GTTTTCCGGCTCAACCGGAAAA     | 194           | 58 celcius      | This study |
|                                     | reverse   | CTACCAGGGTATCTAATCCTGT     |               |                 |            |
| <i>Rhodospirillaceae</i>            | forward   | AAACTCAAAGGAATTACGGGG      | 194           | 58 celcius      | This study |
|                                     | reverse   | GGACTTAACCCAACATCTCAC      |               |                 |            |
| <i>Bradyrhizobium</i>               | forward   | GGG AAG ATA ATG ACG GTA CC | 224           | 58 celcius      | This study |
|                                     | reverse   | TCT ACA CTC GCA GTT CCA CT |               |                 |            |
| <i>Uncultured bacterium</i>         | forward   | CAAACAGGATTAGATACCCTGG     | 209           | 58 celcius      | This study |
|                                     | reverse   | GTAGGTAAGGTTTTTCGCGTTG     |               |                 |            |
| <i>Burkholderiales</i>              | forward   | GCACAAGCGGTGGATGATGT       | 190           | 58 celcius      | This study |
|                                     | reverse   | TGACAAGGGTTGCGCTCGTT       |               |                 |            |
| <i>Natronincola</i>                 | forward   | CCA CAC TGG AAC TGA GAC AC | 226           | 58 celcius      | This study |
|                                     | reverse   | ATT CCG GAT AAC GCT TGC CC |               |                 |            |
| <i>Gemmata</i>                      | forward   | ACAGGTGCTGCATGGCTGT        | 197           | 58 celcius      | This study |
|                                     | reverse   | ATTGTAGCACGTGTGCAGCC       |               |                 |            |
