# Supplementary material for: Distinct Gut Microbiota in Patients with Asymptomatic Hyperuricemia: A Potential Protector against Gout Development
Source: PubMed Central journal article supplement — Yonsei Med J. 2022 Feb 17;63(3):241–51. doi: 10.3349/ymj.2022.63.3.241 (PMC8860935; doi:10.3349/ymj.2022.63.3.241), 2022-02-17
Supplement: ymj-63-241-s002.pdf [file ymj-63-241-s002.pdf]

**Supplementary Table 2.** Changes in Gut Microbiome of Gout Patients before and after ULT Confirmed Using Quantitative PCR

| Taxonomy                                                                                                                        | Patient                      | by Absolute values |   |   |   |   |   |   | by Proportion |    |   |   |   |   |   |   |   |    |
|---------------------------------------------------------------------------------------------------------------------------------|------------------------------|--------------------|---|---|---|---|---|---|---------------|----|---|---|---|---|---|---|---|----|
|                                                                                                                                 |                              | 1                  | 2 | 4 | 5 | 6 | 7 | 9 | 11            | 13 | 1 | 2 | 4 | 5 | 6 | 7 | 9 | 11 |
| Bacteria;;Bacteroidetes;;Bacteroidia;;Bacteroidales;;Prevotellaceae;;Prevotella;EU459805_s                                      | EU459805_s                   | +                  | + | 0 | - | - | + | - | +             | +  |   |   |   |   |   |   |   |    |
| Bacteria;;Bacteroidetes;;Bacteroidia;;Bacteroidales;;Prevotellaceae;;Prevotella_uc                                              | Prevotella_uc                | -                  | + | + | - | + | + | - | +             | -  |   |   |   |   |   |   |   |    |
| Bacteria;;Bacteroidetes;;Bacteroidia;;Bacteroidales;;Bacteroidaceae;;Bacteroides;Bacteroides_uc                                 | Bacteroides_uc               | +                  | - | + | + | - | + | - | +             | -  |   |   |   |   |   |   |   |    |
| Bacteria;;Firmicutes;;Negativicutes;;Veillonellales;;Veillonellaceae;;Dialister;Dialister succinatiphilus                       | Dialister succinatiphilus    | +                  | - | - | + | 0 | + | 0 | 0             | 0  |   |   |   |   |   |   |   |    |
| Bacteria;;Firmicutes;;Clostridia;;Clostridiales;;Lachnospiraceae;;GL872355_g;GL872355_s                                         | GL872355_s                   | -                  | + | 0 | 0 | + | 0 | - | -             | +  |   |   |   |   |   |   |   |    |
| Bacteria;;Firmicutes;;Negativicutes;;Veillonellales;;Veillonellaceae;;Dialister;Dialister_uc                                    | EU462041_s                   | +                  | - | 0 | 0 | 0 | + | - | +             | 0  |   |   |   |   |   |   |   |    |
| Bacteria;;Bacteroidetes;;Bacteroidia;;Bacteroidales;;Prevotellaceae;;Prevotellaceae_uc;Prevotellaceae_uc_s                      | Prevotellaceae_uc_s          | -                  | + | - | - | - | + | - | +             | +  |   |   |   |   |   |   |   |    |
| Bacteria;;Bacteroidetes;;Bacteroidia;;Bacteroidales;;Bacteroidaceae;;Bacteroidaceae_uc;Bacteroidaceae_uc_s                      | Bacteroidaceae_uc_s          | +                  | + | + | + | - | + | - | +             | -  |   |   |   |   |   |   |   |    |
| Bacteria;;Firmicutes;;Clostridia;;Clostridiales;;Ruminococcaceae;;AB185816_g;EF405071_s                                         | EF405071_s                   | 0                  | + | - | + | 0 | + | + | +             | 0  |   |   |   |   |   |   |   |    |
| Bacteria;;Bacteroidetes;;Bacteroidia;;Bacteroidales;;S24-7_f;DQ824928_g;DQ824928_s                                              | DQ824928_s                   | 0                  | 0 | + | 0 | 0 | + | 0 | +             | 0  |   |   |   |   |   |   |   |    |
| Bacteria;;Firmicutes;;Negativicutes;;Veillonellales;;Veillonellaceae;;Dialister;Dialister_uc                                    | Dialister_uc                 | -                  | - | + | + | 0 | + | + | 0             | 0  |   |   |   |   |   |   |   |    |
| Bacteria;;Firmicutes;;Clostridia;;Clostridiales;;Lachnospiraceae;;Agathobacter;Agathobacter_uc                                  | Agathobacter_uc              | 0                  | - | 0 | + | 0 | 0 | + | 0             | 0  |   |   |   |   |   |   |   |    |
| Bacteria;;Firmicutes;;Clostridia;;Clostridiales;;Ruminococcaceae;;Ruminococcus_g2;Ruminococcus_g2_uc                            | Ruminococcus_g2_uc           | +                  | + | 0 | + | 0 | - | 0 | 0             | 0  |   |   |   |   |   |   |   |    |
| Bacteria;;Firmicutes;;Clostridia;;Clostridiales;;Clostridiales_uc;Clostridiales_uc_g;Clostridiales_uc_s                         | Clostridiales_uc_s           | 0                  | - | - | - | + | + | - | +             | +  |   |   |   |   |   |   |   |    |
| Bacteria;;Firmicutes;;Clostridia;;Clostridiales;;Lachnospiraceae;;Murimonas;PAC000196_s                                         | PAC000196_s                  | 0                  | - | + | + | 0 | 0 | 0 | +             | 0  |   |   |   |   |   |   |   |    |
| Bacteria;;Firmicutes;;Clostridia;;Clostridiales;;Ruminococcaceae;;Butyrivibrio;FJ510897_s                                       | FJ510897_s                   | 0                  | 0 | 0 | 0 | + | + | 0 | +             | 0  |   |   |   |   |   |   |   |    |
| Bacteria;;Firmicutes;;Clostridia;;Clostridiales;;Lachnospiraceae;;Clostridium_g24;Clostridium_g24_uc                            | Clostridium_g24_uc           | 0                  | 0 | 0 | 0 | + | 0 | - | +             | +  |   |   |   |   |   |   |   |    |
| Bacteria;;Firmicutes;;Negativicutes;;Veillonellales;;Veillonellaceae;;Veillonellaceae_uc;Veillonellaceae_uc_s                   | Veillonellaceae_uc_s         | -                  | - | + | + | 0 | + | + | 0             | +  |   |   |   |   |   |   |   |    |
| Bacteria;;Bacteroidetes;;Bacteroidia;;Bacteroidales;;Bacteroidales_uc;Bacteroidales_uc_g;Bacteroidales_uc_s                     | Bacteroidales_uc_s           | -                  | - | + | - | + | - | + | +             |    |   |   |   |   |   |   |   |    |
| Bacteria;;Firmicutes;;Clostridia;;Clostridiales;;Ruminococcaceae;;AB009176_g;AB009176_g_uc                                      | AB009176_g_uc                | 0                  | 0 | 0 | 0 | 0 | + | 0 | 0             | 0  |   |   |   |   |   |   |   |    |
| Bacteria;;Firmicutes;;Clostridia;;Clostridiales;;Ruminococcaceae;;Sporobacter;EF402847_s                                        | EF402847_s                   | -                  | 0 | + | + | 0 | + | - | 0             | 0  |   |   |   |   |   |   |   |    |
| Bacteria;;Firmicutes;;Clostridia;;Clostridiales;;Lachnospiraceae;;Eisenbergiella;DQ905770_s                                     | DQ905770_s                   | 0                  | + | + | + | 0 | + | + | 0             | 0  |   |   |   |   |   |   |   |    |
| Bacteria;;Bacteroidetes;;Bacteroidia;;Bacteroidales;;Odoribacteraceae;;Butyrivibrio;Butyrivibrio_virosa                         | Butyrivibrio_virosa          | 0                  | - | + | + | 0 | 0 | + | +             | 0  |   |   |   |   |   |   |   |    |
| Bacteria;;Firmicutes;;Clostridia;;Clostridiales;;Christensenellaceae;;Christensenella;Christensenella_uc                        | Christensenella_uc           | +                  | 0 | + | - | 0 | + | - | 0             | 0  |   |   |   |   |   |   |   |    |
| Bacteria;;Firmicutes;;Bacilli;;Lactobacillales;;Leuconostocaceae;;Leuconostocaceae_uc;Leuconostocaceae_uc_s                     | Leuconostocaceae_uc_s        | 0                  | 0 | 0 | + | 0 | + | + | -             | -  |   |   |   |   |   |   |   |    |
| Bacteria;;Firmicutes;;Clostridia;;Clostridiales;;Lachnospiraceae;;Blautia;FJ880520_s                                            | FJ880520_s                   | 0                  | + | 0 | 0 | + | 0 | 0 | +             | 0  |   |   |   |   |   |   |   |    |
| Bacteria;;Firmicutes;;Clostridia;;Clostridiales;;Lachnospiraceae;;Agathobacter;FJ680757_s                                       | FJ680757_s                   | 0                  | - | 0 | 0 | 0 | 0 | + | 0             | 0  |   |   |   |   |   |   |   |    |
| Bacteria;;Firmicutes;;Clostridia;;Clostridiales;;Lachnospiraceae;;Clostridium_g12;HQ770262_s                                    | HQ770262_s                   | 0                  | - | 0 | 0 | 0 | 0 | + | 0             | 0  |   |   |   |   |   |   |   |    |
| Bacteria;;Firmicutes;;Bacilli;;Lactobacillales;;Lactobacillaceae;;Lactobacillus;Lactobacillus casei group                       | Lactobacillus casei group    | +                  | + | 0 | 0 | 0 | 0 | + | +             | +  |   |   |   |   |   |   |   |    |
| Bacteria;;Firmicutes;;Negativicutes;;Selenomonadales;;Selenomonadaceae;;Mitsuokella;Mitsuokella jalaludini                      | Mitsuokella jalaludini       | +                  | - | 0 | 0 | 0 | 0 | 0 | 0             | 0  |   |   |   |   |   |   |   |    |
| Bacteria;;Firmicutes;;Clostridia;;Clostridiales;;Lachnospiraceae;;JPZU_g;JPZU_g_uc                                              | JPZU_g_uc                    | 0                  | 0 | 0 | 0 | 0 | - | + | 0             |    |   |   |   |   |   |   |   |    |
| Bacteria;;Proteobacteria;;Betaproteobacteria;;Burkholderiales;;Burkholderiaceae;;Paraburkholderia;Paraburkholderia kururiensis  | Paraburkholderia kururiensis | 0                  | 0 | - | 0 | 0 | 0 | + | +             |    |   |   |   |   |   |   |   |    |
| Bacteria;;Firmicutes;;Clostridia;;Clostridiales;;Lachnospiraceae;;Coprococcus_g2;EU776475_s                                     | EU776475_s                   | 0                  | - | 0 | + | - | 0 | - | +             | 0  |   |   |   |   |   |   |   |    |
| Bacteria;;Bacteroidetes;;Bacteroidia;;Bacteroidales;;Bacteroidaceae;;Bacteroides;HQ816544_s                                     | HQ816544_s                   | 0                  | 0 | 0 | 0 | 0 | 0 | 0 | 0             | 0  |   |   |   |   |   |   |   |    |
| Bacteria;;Proteobacteria;;Alphaproteobacteria;;Rhodospirillales;;Rhodospirillaceae;;Rhodospirillaceae_uc;Rhodospirillaceae_uc_s | Rhodospirillaceae_uc_s       | +                  | 0 | - | 0 | 0 | 0 | - | 0             | -  |   |   |   |   |   |   |   |    |
| Bacteria;;Proteobacteria;;Alphaproteobacteria;;Rhizobiales;;Bradyrhizobiaceae;;Bradyrhizobiaceae_uc;Bradyrhizobiaceae_uc_s      | Bradyrhizobiaceae_uc_s       | -                  | 0 | 0 | - | 0 | 0 | - | 0             | -  |   |   |   |   |   |   |   |    |
| Bacteria;;Actinobacteria;;Actinobacteria_c;;Actinomycetales;;Actinomycetaceae;;Actinomyces;Actinomyces viscosus group           | Actinomyces viscosus group   | +                  | 0 | 0 | 0 | 0 | 0 | + | 0             |    |   |   |   |   |   |   |   |    |
| Bacteria;;Firmicutes;;Clostridia;;Clostridiales;;Eubacteriaceae;;Anaerofustis;Anaerofustis_uc                                   | Anaerofustis_uc              | -                  | 0 | - | 0 | 0 | + | 0 | 0             | 0  |   |   |   |   |   |   |   |    |
| Bacteria;;Proteobacteria;;Alphaproteobacteria;;Rhodospirillales;;Rhodospirillaceae;;Rhodospirillaceae_uc;Rhodospirillaceae_uc_s | Rhodospirillaceae_uc_s       | +                  | 0 | - | 0 | 0 | 0 | - | 0             | -  |   |   |   |   |   |   |   |    |
| Bacteria;;Proteobacteria;;Alphaproteobacteria;;Rhizobiales;;Bradyrhizobiaceae;;Bradyrhizobium;Bradyrhizobium_uc                 | Bradyrhizobium_uc            | -                  | 0 | 0 | - | 0 | 0 | - | 0             | -  |   |   |   |   |   |   |   |    |
| Bacteria;;Proteobacteria;;Betaproteobacteria;;Burkholderiales;;Ralstonia_f;Ralstonia;AM713401_s                                 | AM713401_s                   | +                  | 0 | - | 0 | 0 | - | 0 | 0             | 0  |   |   |   |   |   |   |   |    |
| Bacteria;;Proteobacteria;;Betaproteobacteria;;Burkholderiales;;Burkholderiales_uc;Burkholderiales_uc_g;Burkholderiales_uc_s     | Burkholderiales_uc_s         | -                  | 0 | 0 | 0 | + | + | 0 | -             |    |   |   |   |   |   |   |   |    |
| Bacteria;;Firmicutes;;Clostridia;;Clostridiales;;Natronincola_f;Natronincola_f_uc;Natronincola_f_uc_s                           | Natronincola_f_uc_s          | 0                  | 0 | 0 | 0 | + | + | 0 | +             | +  |   |   |   |   |   |   |   |    |
| Bacteria;;Planctomycetes;;Planctomycetia;;Planctomycetales;;Gemmata_f;Gemmata_f_uc;Gemmata_f_uc_s                               | Gemmata_f_uc_s               | 0                  | 0 | 0 | 0 | 0 | 0 | 0 | 0             | -  |   |   |   |   |   |   |   |    |

ULT, uric acid-lowering therapy; PCR, polymerase chain reaction.

0, no detection before/after ULT; +, more detection after ULT; -, less detection after ULT. Consistent "+" results (0 is ignored) is marked in green, and "-" is marked in scarlet. The proportion of Bradyrhizobium\_uc was significantly higher in acute gout patients who recently experienced an acute gout attack and were never subjected to ULT and the proportion consistently decreased after ULT.
