# Supplementary material for: Distinct Gut Microbiota in Patients with Asymptomatic Hyperuricemia: A Potential Protector against Gout Development
Source: PubMed Central journal article supplement — Yonsei Med J. 2022 Feb 17;63(3):241–51. doi: 10.3349/ymj.2022.63.3.241 (PMC8860935; doi:10.3349/ymj.2022.63.3.241), 2022-02-17
Supplement: ymj-63-241-s003.pdf [file ymj-63-241-s003.pdf]

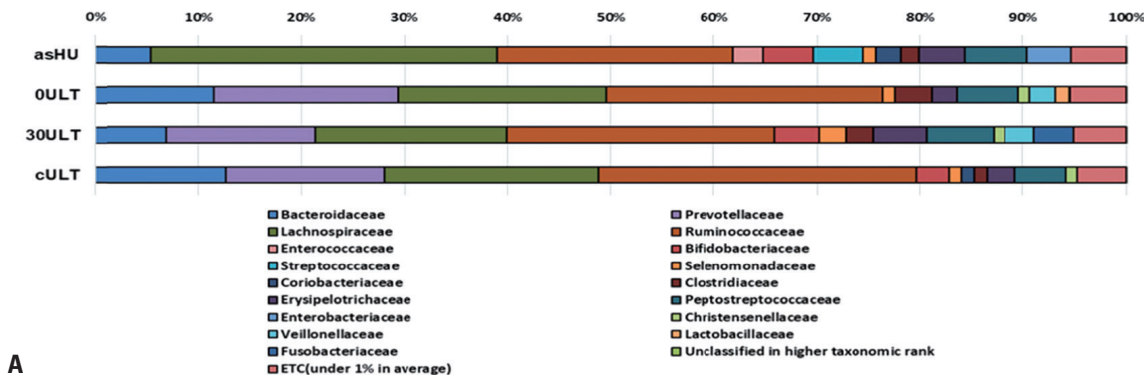

A

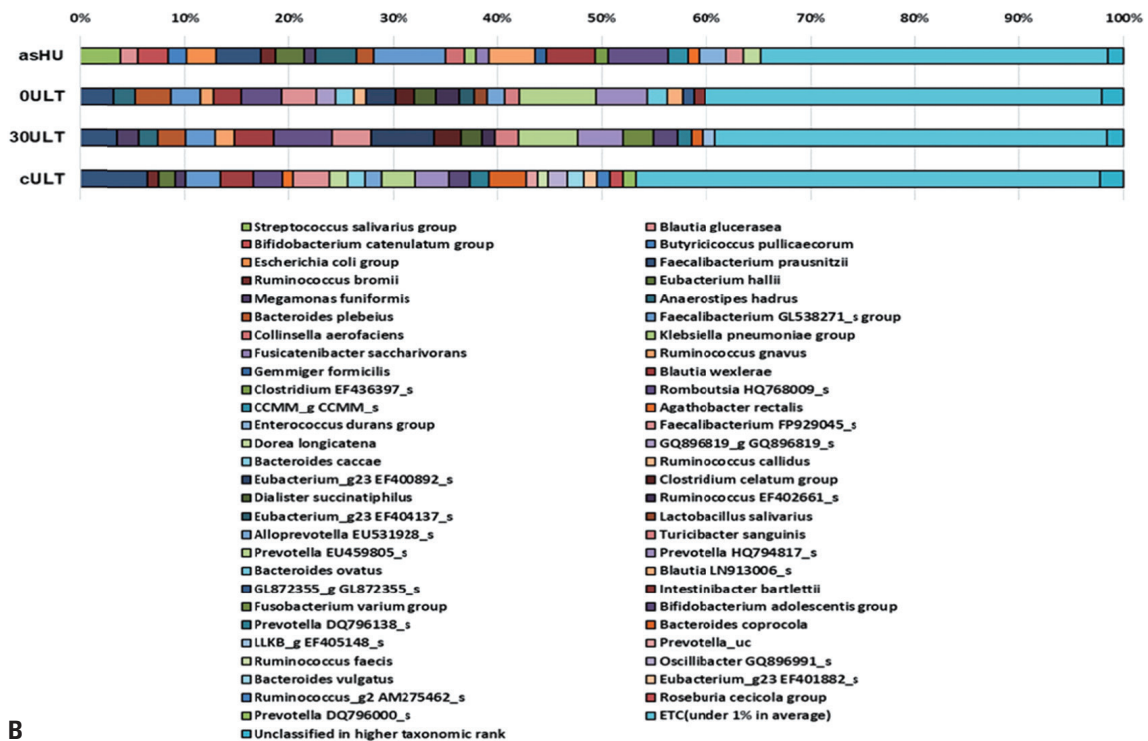

B

**Supplementary Fig. 1.** Averaged taxonomic compositions in the bacterial (A) family and (B) species. Variations were apparent between asHU and gout patients. ULT, uric acid-lowering therapy; asHU, asymptomatic hyperuricemia; 0ULT, acute gout patients before ULT; 30ULT, acute gout patients after 30-day ULT; cULT, chronic gout patients after  $\geq 6$ -month ULT.
