# Supplementary material for: Distinct Gut Microbiota in Patients with Asymptomatic Hyperuricemia: A Potential Protector against Gout Development
Source: PubMed Central journal article supplement — Yonsei Med J. 2022 Feb 17;63(3):241–51. doi: 10.3349/ymj.2022.63.3.241 (PMC8860935; doi:10.3349/ymj.2022.63.3.241), 2022-02-17
Supplement: ymj-63-241-s004.pdf [file ymj-63-241-s004.pdf]

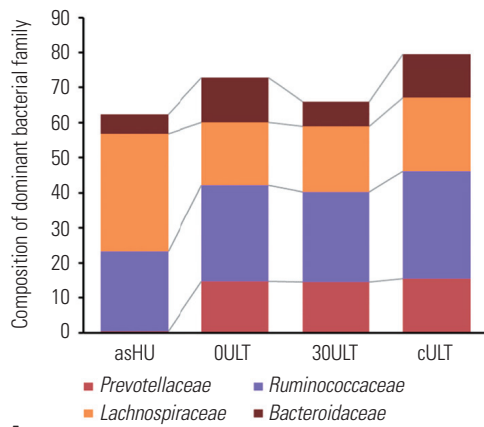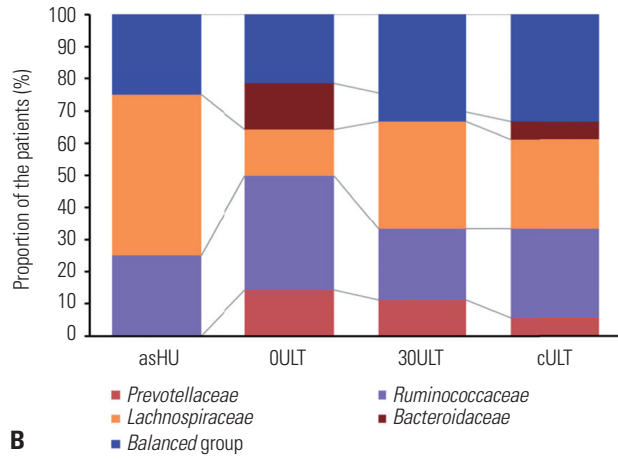

**A**

**B**

**Supplementary Fig. 2.** Enterotype analysis. (A) Composition of dominant bacterial families in patients with asHU and with gout. (B) Proportion of patients with dominant taxa group. ULT, uric acid-lowering therapy; asHU, asymptomatic hyperuricemia; OULT, acute gout patients before ULT; 30ULT, acute gout patients after 30-day ULT; cULT, chronic gout patients after  $\geq 6$ -month ULT.
