# Supplementary material for: Distinct Gut Microbiota in Patients with Asymptomatic Hyperuricemia: A Potential Protector against Gout Development
Source: PubMed Central journal article supplement — Yonsei Med J. 2022 Feb 17;63(3):241–51. doi: 10.3349/ymj.2022.63.3.241 (PMC8860935; doi:10.3349/ymj.2022.63.3.241), 2022-02-17
Supplement: ymj-63-241-s006.pdf [file ymj-63-241-s006.pdf]

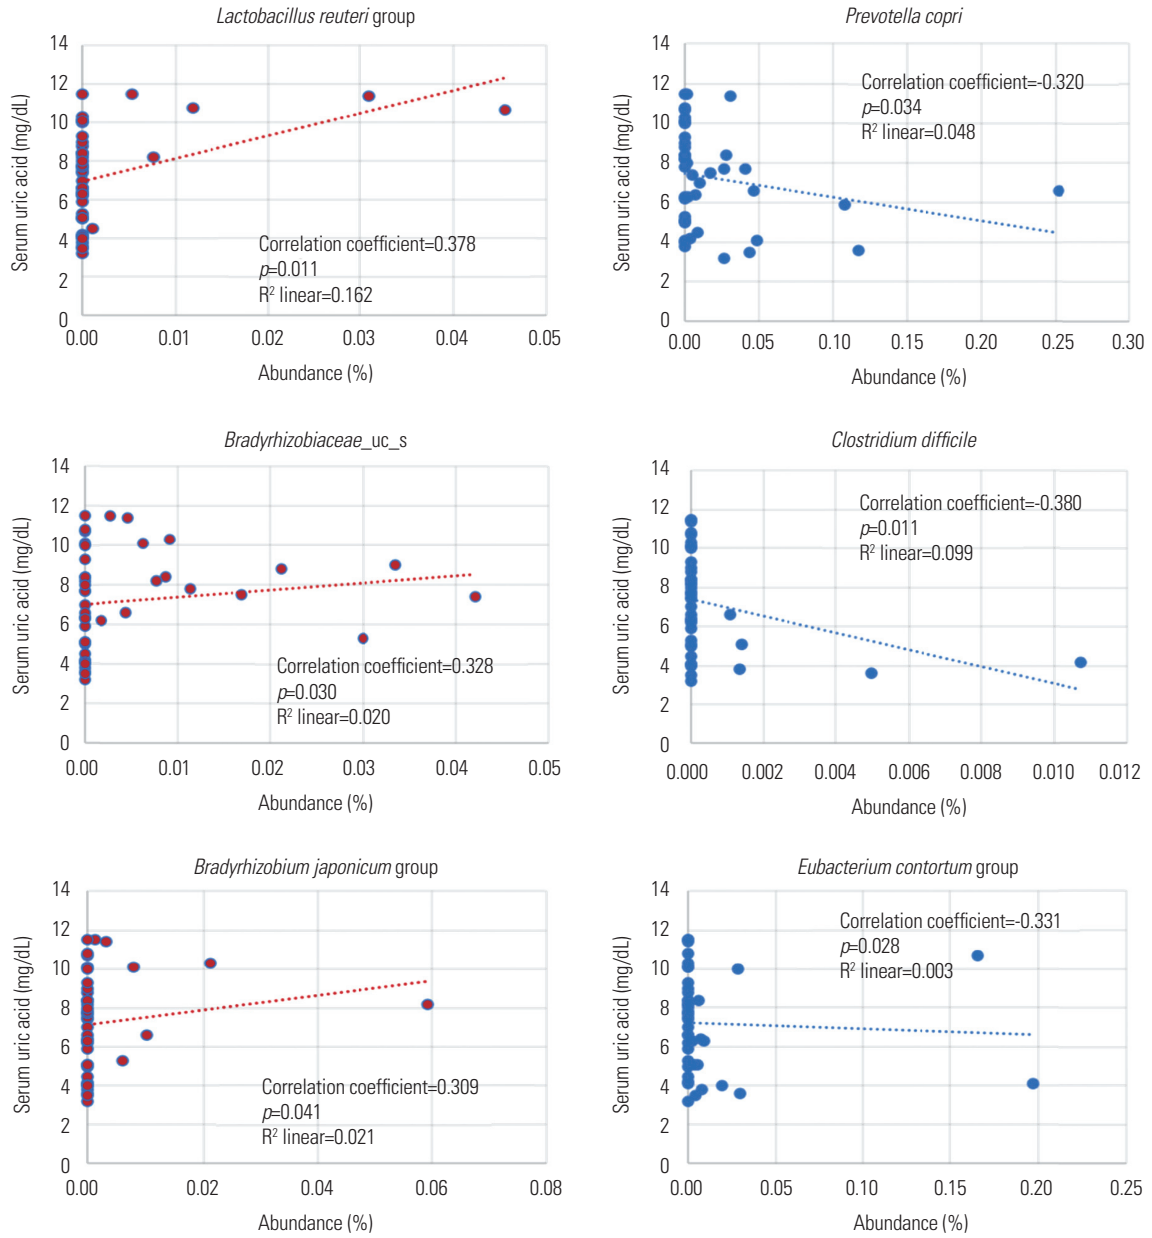

**Supplementary Fig. 4.** Nonparametric Spearman correlation between serum uric acid level and abundance of microbiota.
