# Supplementary material for: Distinct Gut Microbiota in Patients with Asymptomatic Hyperuricemia: A Potential Protector against Gout Development
Source: PubMed Central journal article supplement — Yonsei Med J. 2022 Feb 17;63(3):241–51. doi: 10.3349/ymj.2022.63.3.241 (PMC8860935; doi:10.3349/ymj.2022.63.3.241), 2022-02-17
Supplement: ymj-63-241-s007.pdf [file ymj-63-241-s007.pdf]

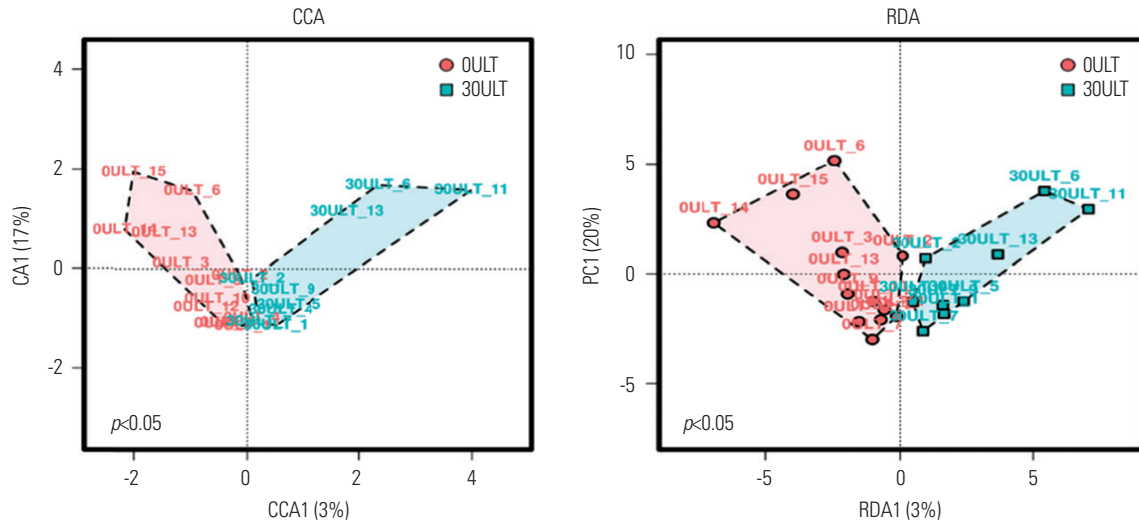

**Supplementary Fig. 5.** Beta diversity analysis using canonical correspondence analysis and redundancy analysis for acute gout patients before and after ULT. Each point represents the composition of the intestinal microbiota of each individual. ULT, uric acid-lowering therapy; OULT, acute gout patients before ULT; 3OULT, acute gout patients after 30-day ULT; CCA, canonical correspondence analysis; RDA, redundancy analysis.
