# Supplementary material for: Distinct Gut Microbiota in Patients with Asymptomatic Hyperuricemia: A Potential Protector against Gout Development
Source: PubMed Central journal article supplement — Yonsei Med J. 2022 Feb 17;63(3):241–51. doi: 10.3349/ymj.2022.63.3.241 (PMC8860935; doi:10.3349/ymj.2022.63.3.241), 2022-02-17
Supplement: ymj-63-241-s008.pdf [file ymj-63-241-s008.pdf]

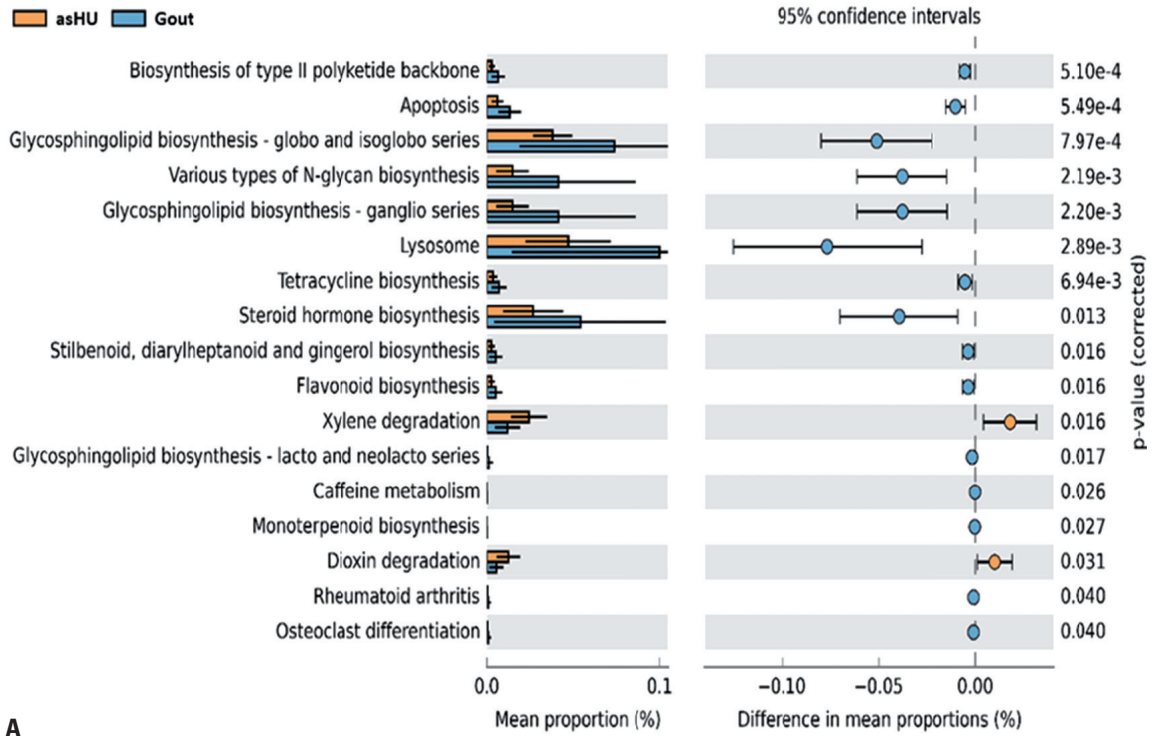

**A**

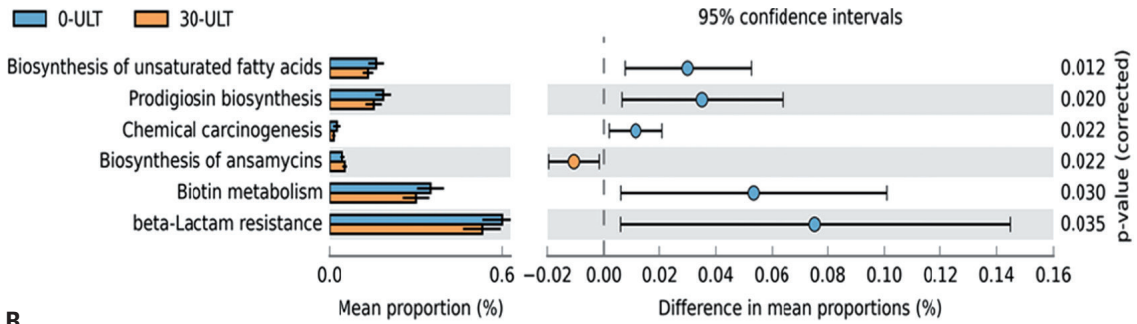

**B**

**Supplementary Fig. 6.** Comparison of predicted KEGG pathway in (A) asHU and gout patients and in (B) 0ULT and 30ULT groups. An extended error bar plot indicating the differences in gut microbiota. Only statistically significant pathways with  $p < 0.05$  are shown. asHU, asymptomatic hyperuricemia; ULT, uric acid-lowering therapy; 0ULT, acute gout patients before ULT; 30ULT, acute gout patients after 30-day ULT; KEGG, Kyoto Encyclopedia of Genes and Genomes.
